# Supplementary material for: Photo-curable resins based on poly(globalide) for 3D printing of resorbable scaffolds: synthesis, crosslinking and post-functionalization
Source: Royal Society of Chemistry journal article supplement (doi:10.1039/d5py00237k), 2025-01-01
Supplement: d5py00237k1.pdf [file d5py00237k1.pdf]

# Photo-curable resins based on poly(globalide) for 3D printing of resorbable scaffolds: synthesis, crosslinking and post-functionalization

Laura Oliveira Rebouças, Isabela Lima Autran Dourado, Giovanna Delechiave, Denisse Esther Mallaupoma Camarena, Sandra Van Vlierberghe, Luiz Henrique Catalani

## SUPPORTING INFORMATION

### 1. <sup>1</sup>H NMR for PGI-DG and PGI-DG-AC with integration values

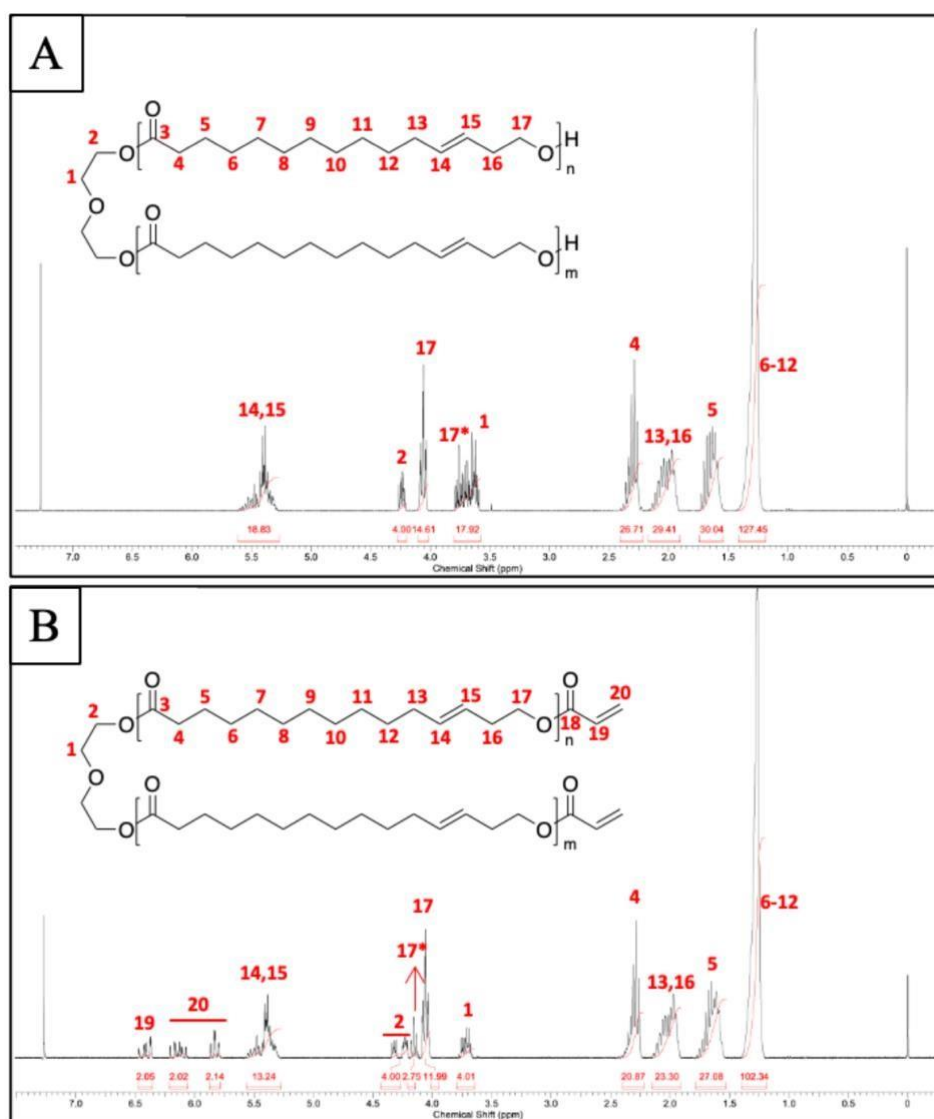

**Figure S1.** <sup>1</sup>H-NMR spectra for (A) PGI-DG and (B) PGI-DG-AC with integration values.

## 2. $^{13}\text{C}$ -NMR for PGL-DG and PGL-DG-AC

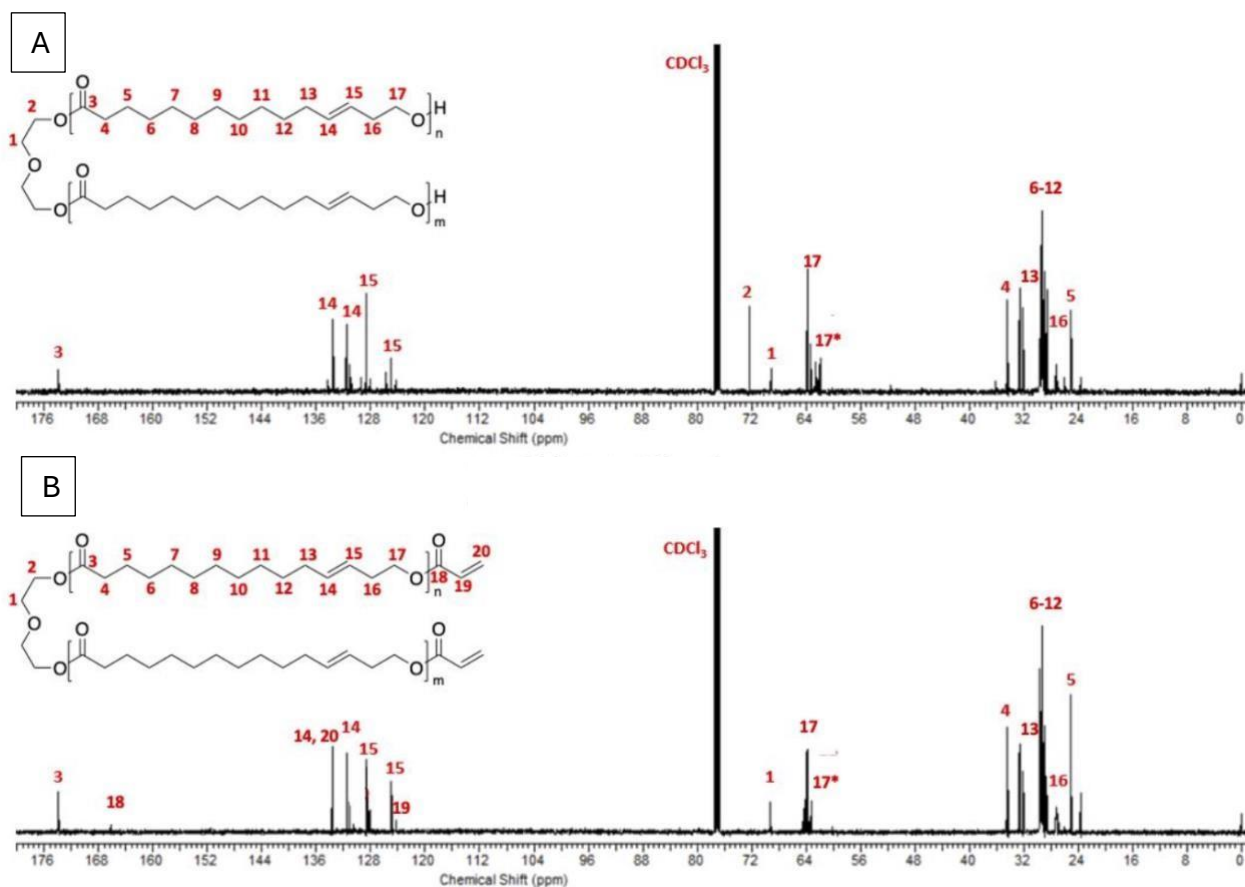

**Figure S2.**  $^{13}\text{C}$ -NMR spectra for (A) PGL-DG and (B) PGL-DG-AC.

## 3. Gel Permeation Chromatography (GPC)

**Table S1.** Molecular weight distribution obtained for homopolymers of globalide initiated by diethylene glycol.

| $m_{\text{GL}} / m_{\text{DG}}$ | $\bar{M}_w$<br>( $\text{kg mol}^{-1}$ ) | $\bar{M}_n$<br>( $\text{kg mol}^{-1}$ ) | PDI |
|---------------------------------|-----------------------------------------|-----------------------------------------|-----|
| <b>650</b>                      | 3.2                                     | 2.5                                     | 1.3 |
| <b>520</b>                      | 4.5                                     | 3.1                                     | 1.4 |
| <b>390</b>                      | 5.4                                     | 4.2                                     | 1.3 |
| <b>265</b>                      | 6.0                                     | 4.5                                     | 1.3 |
| <b>130</b>                      | 8.1                                     | 5.7                                     | 1.4 |
| <b>65</b>                       | 11.9                                    | 7.6                                     | 1.6 |

#### 4. Relation between the degree of substitution and the excess of acryloyl chloride

**Table S2.** Stoichiometric ratio of hydroxyl groups and DS achieved.

| Ratio* | DS expected (%) | DS achieved (%) |
|--------|-----------------|-----------------|
| 1:1.2  | 100             | 19              |
| 1:6    | 100             | 100             |
| 1:8    | 100             | 100             |

\*ratio between -OH groups from PGI-DG and acryloyl chloride moieties

The degree of substitution was calculated by  $^1\text{H}$  NMR integration for signals corresponding to the methylene groups from diethylene glycol (split in 4.24 ppm and 4.35 ppm) and to the olefinic signals from acrylic groups in the region of 5.3—6.6 ppm.

$$\text{degree of substitution (\%)} = \frac{\frac{(I_{\delta 5.8} + I_{\delta 6.1} + I_{\delta 6.4})}{3}}{\frac{(I_{4.2} + I_{4.3})}{2}} 100\%$$

#### 5. MALDI-TOF of PGI-DG and PGI-DG-AC

MALDI-TOF was employed to confirm the chemical structure of PGI-DG and PGI-DG-AC. As one can see in Figure S3, the mass spectra for both materials show underrated  $m/z$  values compared to the molecular weight obtained by GPC. The spacing between peaks for PGI-DG and PGI-DG-AC reveals an addition of  $m/z$  238.4 for each adduct, relating to the repetitive globalide residue units. The mass spectra confirms that e-ROP was successfully initiated by EG (A) but there is also a less representative family of macromolecules initiated by water (B) probably from the inherent layer of water present surrounding the surface of the enzyme (CAL-B).

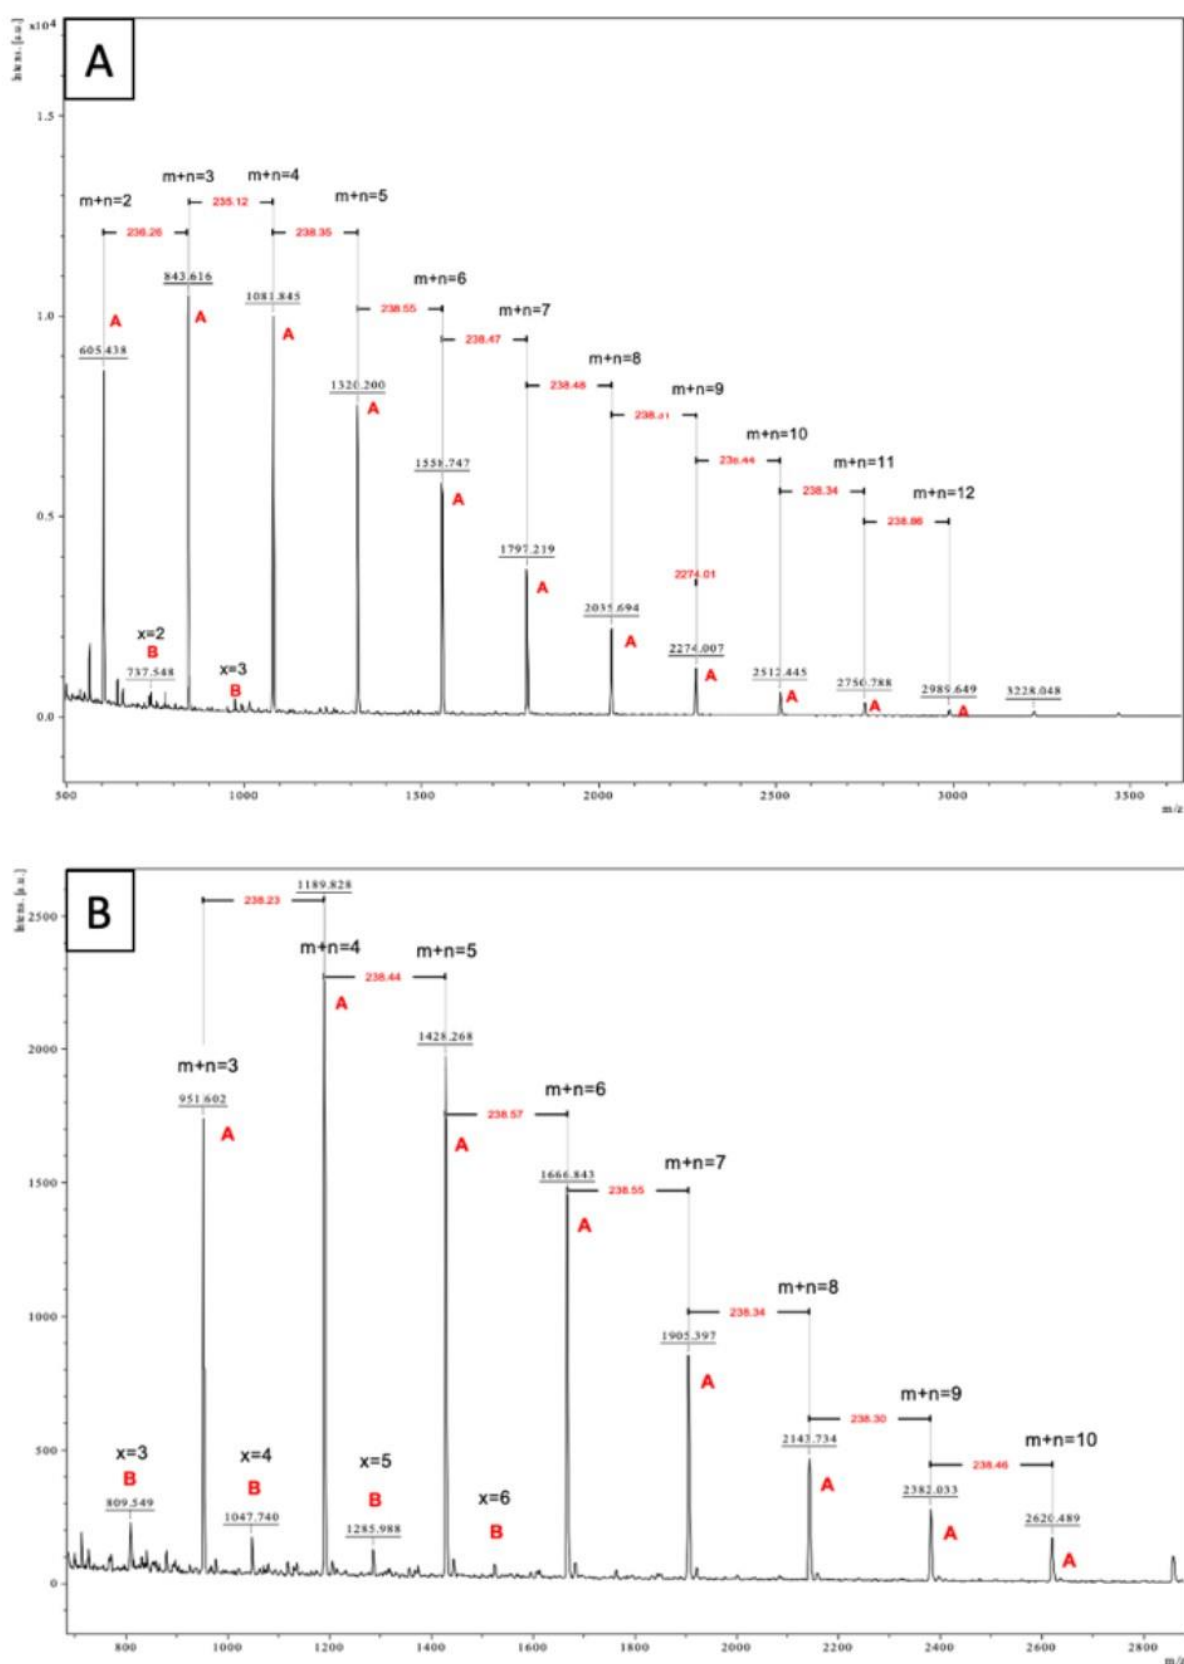

**Figure S3.** MALDI-TOF spectra for A) PGL-DG and B) PGL-DG-AC. “A” represents family of macromolecules that were initiated by diethylene glycol whereas “B” represents the family initiated by water (“m+n” and “x” represent the total amount of globalide residues in each peak).

The peaks A and B in Figure 3S-A are, respectively, representative of the following structures:

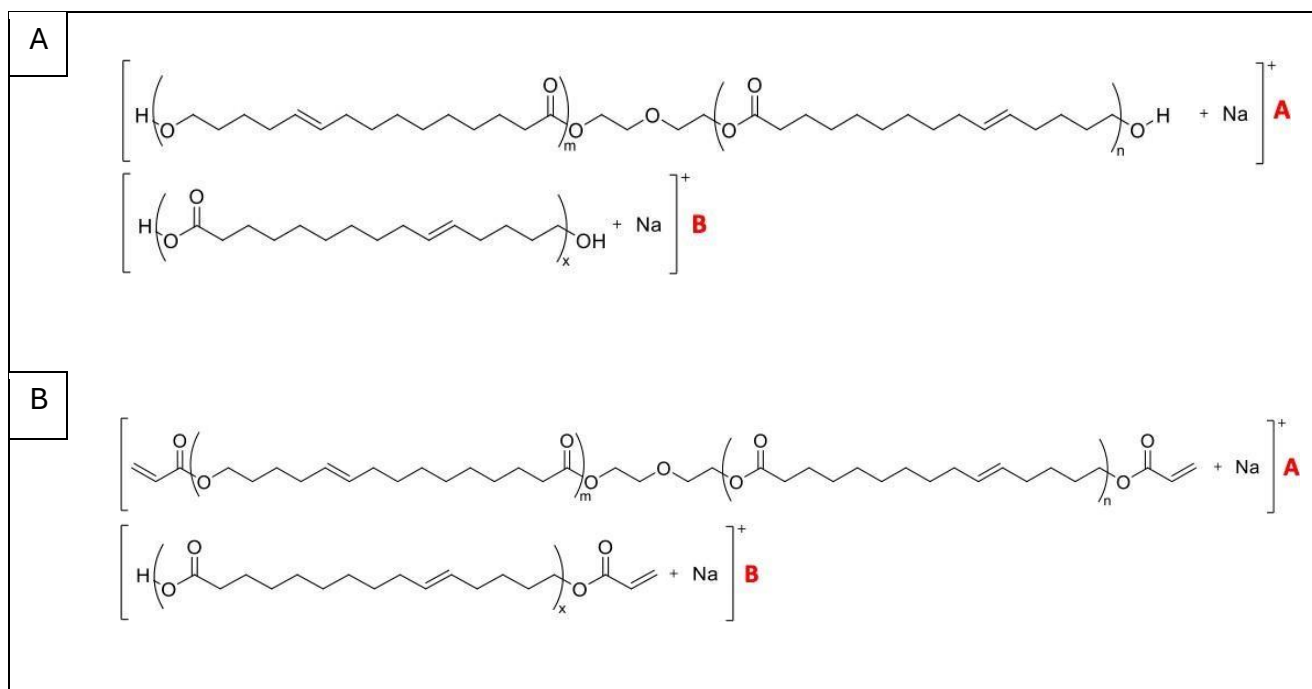

**Figure S4: (A)** schematic representation of polymer structures attributed to peaks A and B in Fig. 3S-A; **(B)** schematic representation of polymer structures attributed to peaks A and B in Fig. 3S-B.

The values of  $m+n$  and  $x$  in the Figure S3 represent the total amount of globalide residues per molecule in each peak. Since acrylic modification occurs only in hydroxyl groups, macromolecules from the B family have one acrylic group per chain, whereas the ones from the A family have two acrylates in each chain.

## 6. Thermal Analysis for PGI-DG and PGI-DG-AC

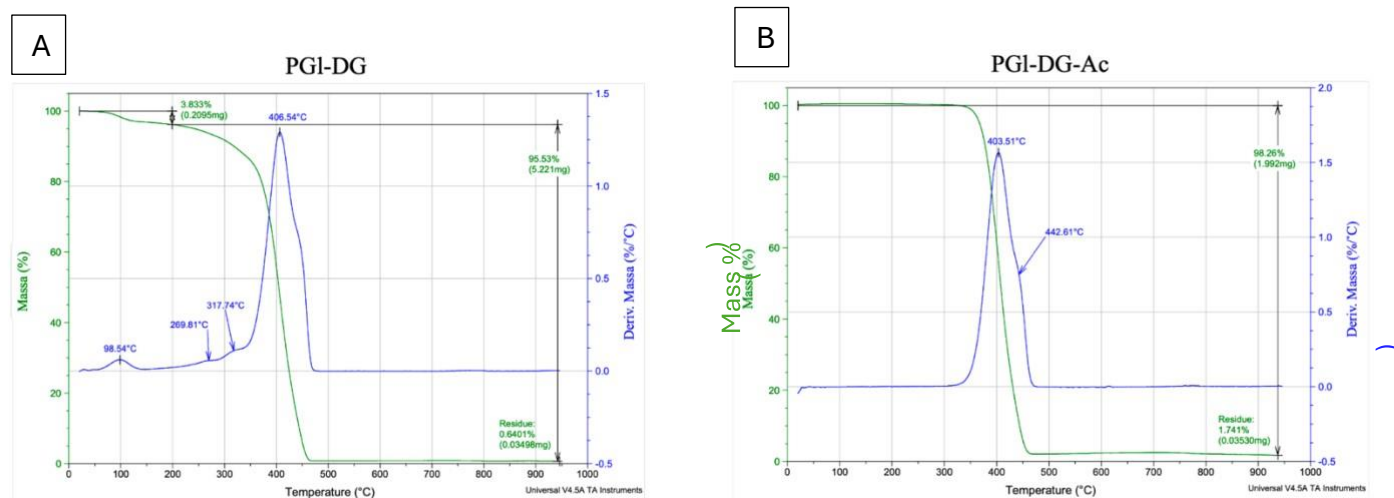

**Figure S5.** TGA thermograms PGI-DG (A) and PGI-DG-AC (B).

## 7. X-Ray Analysis

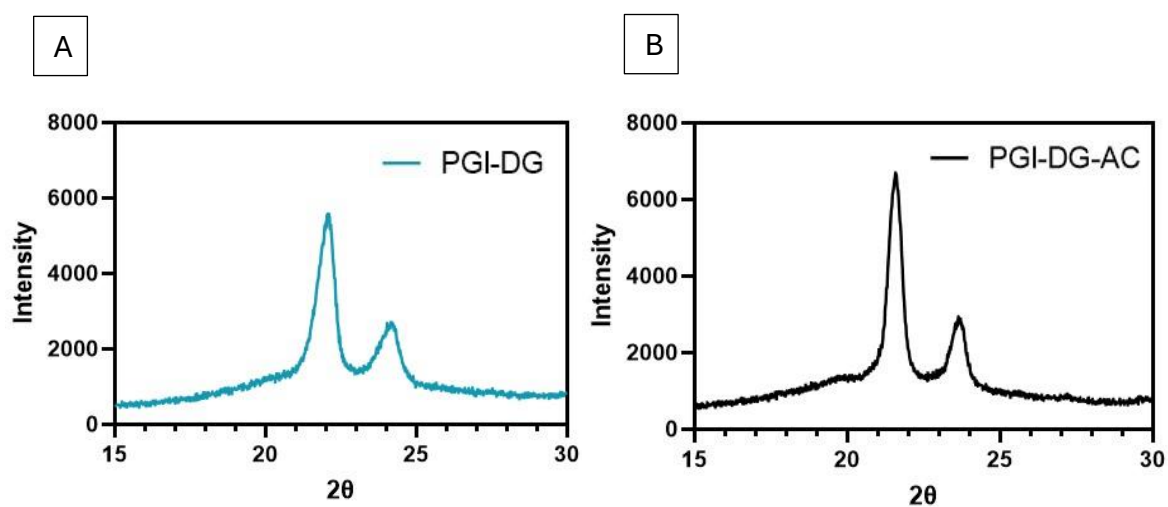

**Figure S6.** WAXD scattering spectra for semi-crystalline PGI-DG (A) and PGI-DG-AC (B).

## 8. Weight fractions of PGI-DG-AC formulations

**Table S3.** Weight fractions of the different formulations that were used.

|                                    | P_    | P_NIPAM | P_NVP | P_PEGDA | P_DECDA |
|------------------------------------|-------|---------|-------|---------|---------|
| <b>Polymer (PGI-DG-AC) (mg)</b>    | 233.3 | 233.3   | 233.3 | 233.3   | 233.3   |
| <b>Photo-initiator (BAPO) (mg)</b> | 18    | 18      | 18    | 18      | 18      |
| <b>Solvent (DCE) (mL)</b>          | 1     | 1       | 1     | 1       | 1       |
| <b>Unsaturated monomer (mg)</b>    | -     | 135.3   | 133.3 | 233.3   | 135.3   |

## 9. DSC of the photo-crosslinked films

To assess whether the films kept the crystalline domains that were present in the polymer before crosslinking, the DSC second heating curves for each films was analyzed. It is worth to say that each film presented a different degradation temperature ( $T_d$ ), thereby the DSC analyses proceed during heating from -20°C until ( $T_d$ -20) °C

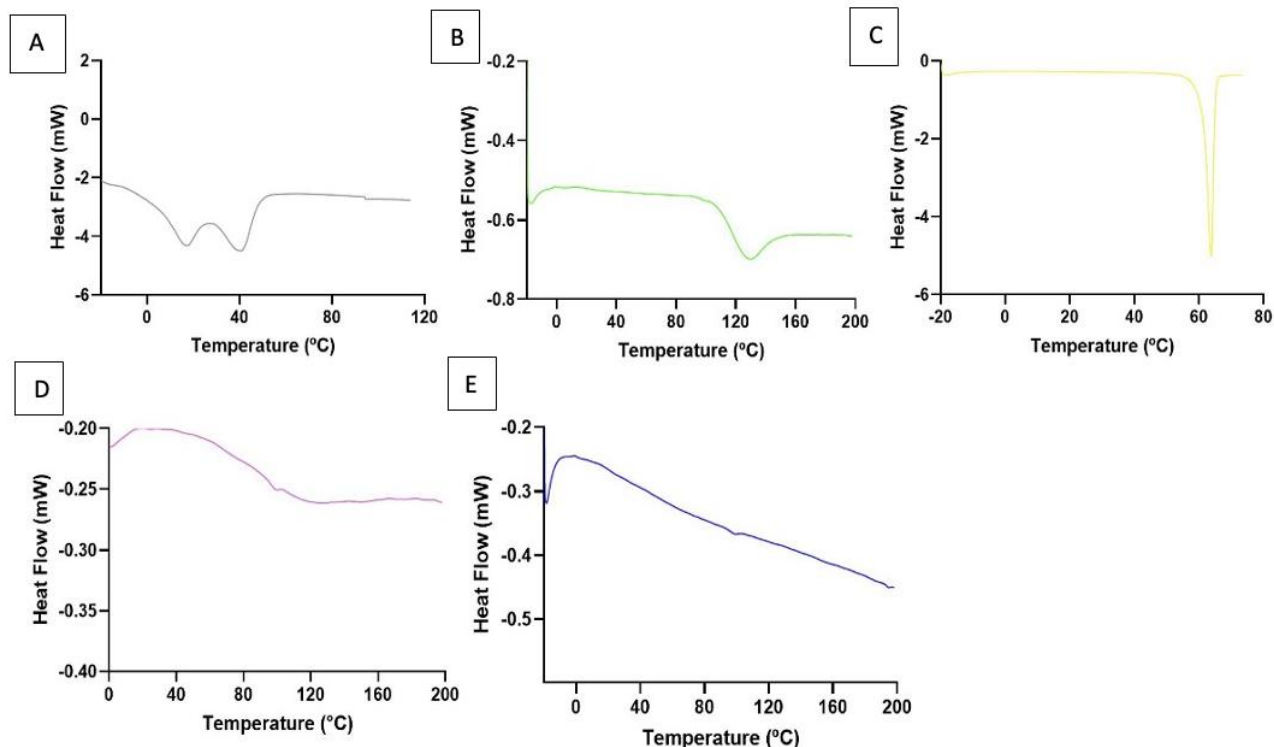

**Figure S7.** DSC curves (second heating scans) of (A) P\_, (B) P\_NVP, (C) P\_NIPAM; (D) P\_PEGDA; (E) P\_DECDA

## 9. Rheology

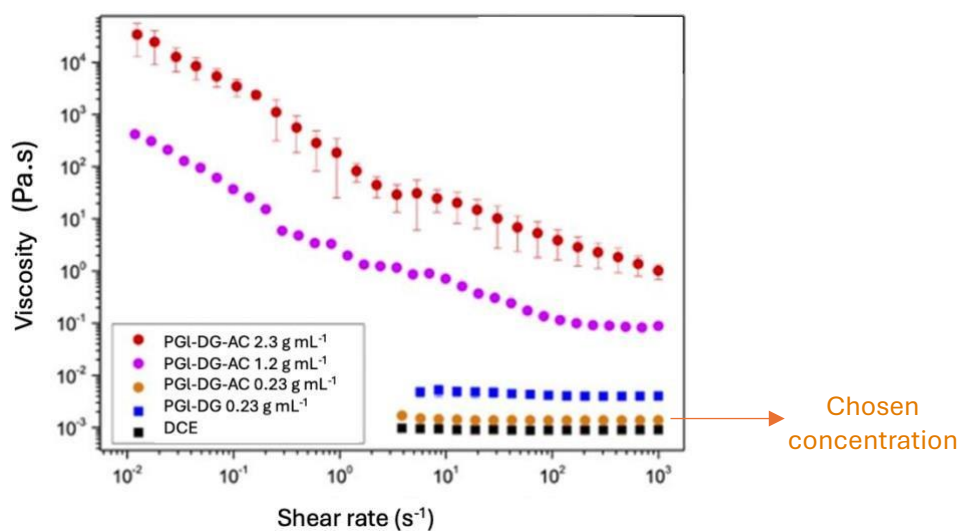

**Figure S8.** Flow curves for PGI-DG and PGI-DG-AC in different concentrations.

## 10. Modifications in the 3D printer

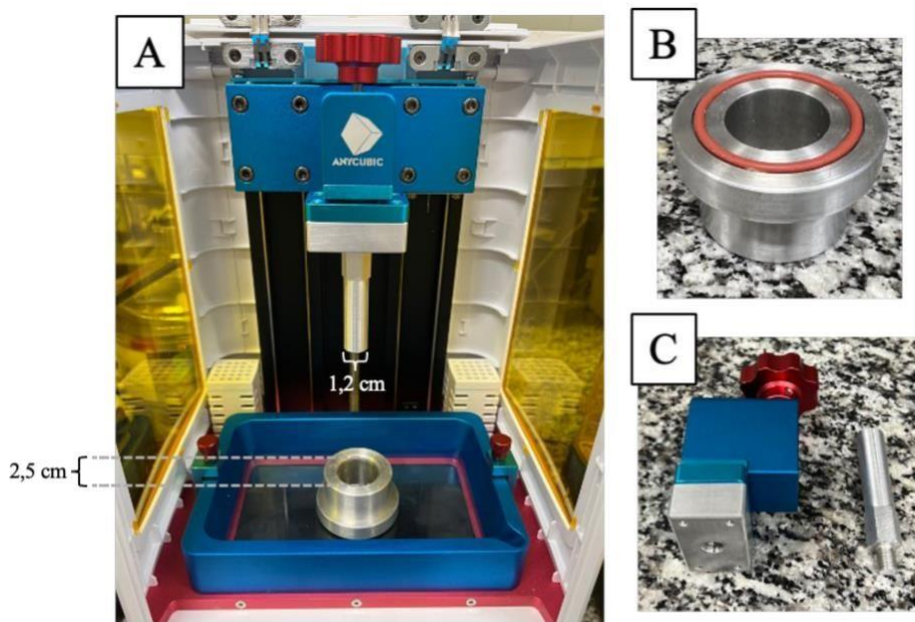

**Figure S9.** Pictures of the customized LCD-based Photon S from Anycubic. (A) 3D printer without the lid with new dimensions of vat and build platform; (B) bottom of new vat with a rubber ring; (C) new small build platform in detail.



## 11. Working curve for the resin of PGI-DG-AC + PEGDA

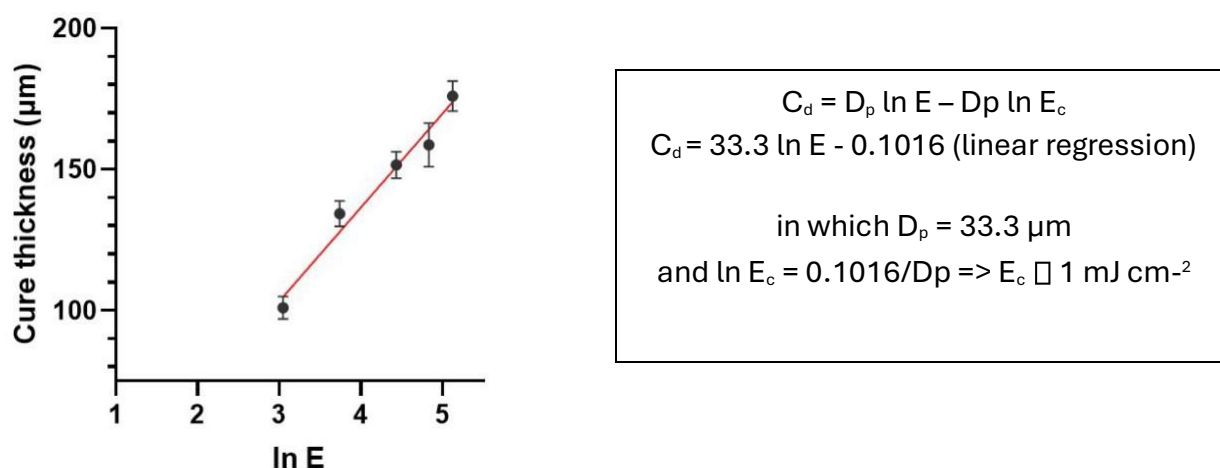

**Figure S10:** Jacob's working curve for the formulation containing PGI-DG-AC and PEGDA.

## 12. 3D printing of simple constructs

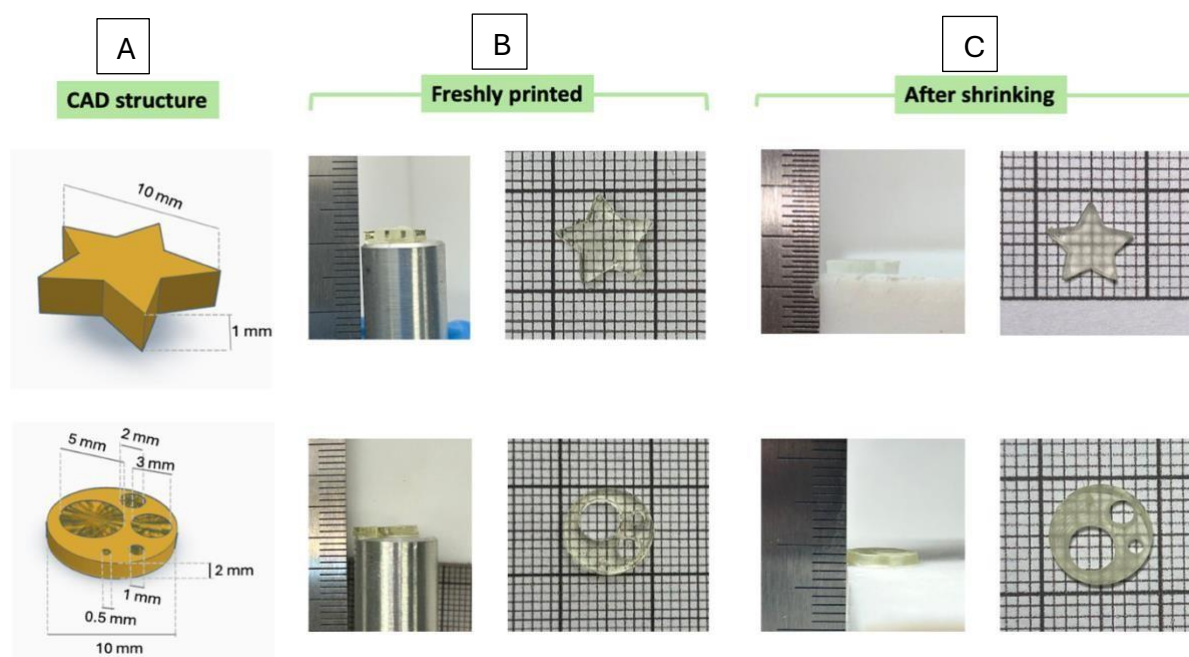

**Figure S11.** (A) CAD designs with pre-defined dimensions; (B) pictures of freshly printed parts; (C) pictures of printed parts after shrinking (all parts were left to dry for 72h). The same formulation containing PGI-DG-AC and PEGDA was used in all cases.

The disc with internal hollows was designed to assess the X-Y resolution. Under these conditions, the resolution limit ranges between 0.5 and 1 mm. After crosslinking, the diameter of the smallest hollow is approximately 1 mm. Adding a photo-absorber could help prevent unwanted crosslinking within the hollows.
